# Supplementary material
Source: PubMed Central journal article supplement (PMC6513352)
Supplement: NIHMS1508245-supplement-1.pdf [file NIHMS1508245-supplement-1.pdf]

### Supplementary Table 1

*L. infantum* primer sequences and qPCR efficiency. Gene accession numbers, forward/reverse primer sequences, and primer efficiencies for each gene target for the *L. infantum* qPCR assays are presented. Primer efficiency was calculated by assaying diluted cDNA.

| Gene Target | Accession    | Forward Primer                  | Reverse Primer                  | Primer Efficiency |
|-------------|--------------|---------------------------------|---------------------------------|-------------------|
| <i>UBH</i>  | LinJ.29.2410 | 5'-AACGTGAACAACCTGGATGTGCGTC-3' | 5'-ATGGTGCCAAGCTTGACACACGCA-3'  | 103.7%            |
| <i>AML1</i> | LinJ.08.0680 | 5'- AAGTGCCTGGAGCTGAGTGACGGC-3' | 5'-ACGGGAGCATCAGGAAGATAATGT-3'  | 94.5%             |
| <i>AML2</i> | LinJ.08.0780 | 5'-CATCGTCGTGTACGGCTTGGCTTT-3'  | 5'- TGTAGTAGTCCACCATCATGAGCG-3' | 94.2%             |
| <i>P27</i>  | LinJ.28.1070 | 5'-TTACCGCTCCGCTACAACGTGCT-3'   | 5'- ACCACAGGGAGTAGATCACGACAA-3' | 91.6%             |
| <i>ATG8</i> | LinJ.19.1660 | 5'- ACAAGAGCAAGTTCTTGGTACCGC-3' | 5'- AAACAGCACTCTCATGAGCGACCT-3' | 98.4%             |
| <i>A2</i>   | LinJ.22.0670 | 5'-GTCCGCTTGTGGTGTGCTG-3'       | 5'- CAACGGCCGCCTTGTGC-3'        | 92.6%             |
| <i>Pr2C</i> | LinJ.16.1510 | 5'- ATGAGCATCGCTGCGGACAT-3'     | 5'- GGTTGTGGATCTTCTGCTTGC-3'    | 90%               |
